# Supplementary material for: Optimising primary molecular profiling in non-small cell lung cancer
Source: PubMed Central journal article supplement (PMC11290658; doi:10.1371/journal.pone.0290939), 2024-07-31
Supplement: pone.0290939.s002.pdf [file pone.0290939.s002.pdf]

**S1 Table. Participating centres.** The following hospitals have including patients in the Lung cancer Early Molecular Assessment study. All hospitals are located in the Netherlands.

|                                             |
|---------------------------------------------|
| Netherlands Cancer Institute, Amsterdam     |
| Radboud University Medical Centre, Nijmegen |
| Noordwest Ziekenhuis Groep, Alkmaar         |
| University Medical Centre Utrecht           |
| Haaglanden Medical Centre, The Hague        |
| Meander Medical Centre, Amersfoort          |
| Onze Lieve Vrouwe Gasthuis, Amsterdam       |
| Tergooi Ziekenhuizen, Hilversum             |
| Flevoziekenhuis, Almere                     |
| University Medical Centre Groningen         |
