# Supplementary material for: Optimising primary molecular profiling in non-small cell lung cancer
Source: PubMed Central journal article supplement (PMC11290658; doi:10.1371/journal.pone.0290939), 2024-07-31
Supplement: pone.0290939.s003.pdf [file pone.0290939.s003.pdf]

**S2 Table. Feasibility of EGFR and ALK testing in tumour tissue.** The percentage of patients in whom both EGFR and ALK alteration status was tested is shown. Also, the table shows number and percentages of patients in whom testing was not requested (due to unspecified reasons), and reasons for testing being unfeasible. The numbers correspond to the graphs in figure 2. In total, 95 out of 136 patients in the run-in phase were tested for both EGFR and ALK alterations (69.9%). This increased to 77.0% in the protocol phase (568/738). Numbers indicate n(%).

| Any histology                             | Stage I-III |             | Stage IV   |             |
|-------------------------------------------|-------------|-------------|------------|-------------|
|                                           | Run-in      | Protocol    | Run-in     | Protocol    |
| <b>Total number of patients</b>           | 60          | 414         | 76         | 328         |
| EGFR and ALK testing status unknown       | 0           | 3 (0.7%)    | 0          | 1 (0.3%)    |
| Patients tested for EGFR and ALK          | 33 (55.0%)  | 282 (68.6%) | 62 (81.6%) | 286 (87.5%) |
| Patients not tested for EGFR and ALK      | 27 (45.0%)  | 129 (31.4%) | 14 (18.4%) | 41 (12.5%)  |
| EGFR and ALK testing not requested        | 23 (38.3%)  | 71 (17.3%)  | 10 (13.2%) | 11 (3.4%)   |
| EGFR and ALK testing not feasible         | 4 (6.7%)    | 58 (14.1%)  | 4 (5.3%)   | 30 (9.2%)   |
| Insufficient tumour tissue                | 3 (5.0%)    | 36 (8.8%)   | 4 (5.3%)   | 20 (6.1%)   |
| No tumour tissue obtained                 | 1 (1.7%)    | 11 (2.7%)   | 0          | 6 (6.1%)    |
| No tumour tissue available at LEMA centre | 0           | 10 (2.4%)   | 0          | 1 (0.3%)    |
| Patient died before molecular analysis    | 0           | 1 (0.2%)    | 0          | 3 (0.9%)    |

| Non-squamous NSCLC                        | Stage I-III |             | Stage IV   |             |
|-------------------------------------------|-------------|-------------|------------|-------------|
|                                           | Run-in      | Protocol    | Run-in     | Protocol    |
| <b>Total number of patients</b>           | 37          | 295         | 67         | 286         |
| EGFR and ALK testing status unknown       | 0           | 2 (0.7%)    | 0          | 1 (0.3%)    |
| Patients tested for EGFR and ALK          | 22 (59.5%)  | 216 (73.7%) | 59 (88.1%) | 260 (91.2%) |
| Patients not tested for EGFR and ALK      | 15 (40.5%)  | 77 (26.3%)  | 8 (11.9%)  | 25 (8.8%)   |
| EGFR and ALK testing not requested        | 11 (29.7%)  | 41 (14.0%)  | 4 (6.0%)   | 1 (0.4%)    |
| EGFR and ALK testing not feasible         | 4 (10.8%)   | 36 (12.3%)  | 4 (6.0%)   | 24 (8.4%)   |
| Insufficient tumour tissue                | 3 (8.1%)    | 24 (8.2%)   | 4 (6.0%)   | 15 (5.3%)   |
| No tumour tissue obtained                 | 1 (2.7%)    | 8 (2.7%)    | 0          | 6 (2.1%)    |
| No tumour tissue available at LEMA centre | 0           | 4 (1.4%)    | 0          | 0           |
| Patient died before molecular analysis    | 0           | 0           | 0          | 3 (1.1%)    |

| Squamous NSCLC                            | Stage I-III |            | Stage IV  |            |
|-------------------------------------------|-------------|------------|-----------|------------|
|                                           | Run-in      | Protocol   | Run-in    | Protocol   |
| <b>Total number of patients</b>           | 23          | 119        | 9         | 42         |
| EGFR and ALK testing status unknown       | 0           | 1 (0.8%)   | 0         | 0          |
| Patients tested for EGFR and ALK          | 11 (47.8%)  | 66 (55.9%) | 3 (33.3%) | 26 (61.9%) |
| Patients not tested for EGFR and ALK      | 12 (52.2%)  | 52 (44.1%) | 6 (66.7%) | 16 (38.1%) |
| EGFR and ALK testing not requested        | 12 (52.2%)  | 30 (25.4%) | 6 (66.7%) | 10 (23.8%) |
| EGFR and ALK testing not feasible         | 0           | 22 (18.6%) | 0         | 6 (14.3%)  |
| Insufficient tumour tissue                | 0           | 12 (10.2%) | 0         | 5 (11.9%)  |
| No tumour tissue obtained                 | 0           | 3 (2.5%)   | 0         | 0          |
| No tumour tissue available at LEMA centre | 0           | 6 (5.1%)   | 0         | 1 (2.4%)   |
| Patient died before molecular analysis    | 0           | 1 (0.8%)   | 0         | 0          |
