# Supplementary material for: Optimising primary molecular profiling in non-small cell lung cancer
Source: PubMed Central journal article supplement (PMC11290658; doi:10.1371/journal.pone.0290939), 2024-07-31
Supplement: pone.0290939.s004.pdf [file pone.0290939.s004.pdf]

**S3 Table. Feasibility of comprehensive molecular profiling in tumour tissue.** The table shows the absolute numbers and percentage of successful comprehensive molecular profiling. Also, the frequency of missing requests for profiling (due to unspecified reasons) is shown, and reasons for profiling being unfeasible. The data correspond to the graphs in figure 3. Numbers indicate n(%).

| Any histology                                     | Stage I-III |             | Stage IV   |             |
|---------------------------------------------------|-------------|-------------|------------|-------------|
|                                                   | Run-in      | Protocol    | Run-in     | Protocol    |
| <b>Total number of patients</b>                   | 60          | 414         | 76         | 328         |
| Molecular profiling status unknown                | 0           | 2 (0.5%)    | 0          | 1 (0.3%)    |
| Completed molecular profiling                     | 31 (51.7%)  | 249 (60.4%) | 52 (68.4%) | 259 (79.2%) |
| Incomplete molecular profiling                    | 29 (48.3%)  | 163 (39.6%) | 24 (31.6%) | 68 (20.8%)  |
| NGS and/or ALK test not requested                 | 23 (38.3%)  | 70 (17.0%)  | 10 (13.2%) | 11 (3.4%)   |
| ROS1 and/or RET test not requested                | 0           | 28 (6.8%)   | 7 (9.2%)   | 17 (5.2%)   |
| <i>EGFR</i> and <i>ALK</i> testing not feasible   | 6 (10.0%)   | 62 (15.0%)  | 5 (6.6%)   | 35 (10.7%)  |
| Insufficient tumour tissue                        | 5 (8.3%)    | 40 (9.7%)   | 5 (6.6%)   | 25 (7.6%)   |
| No tumour tissue obtained                         | 1 (1.7%)    | 11 (2.7%)   | 0          | 6 (1.8%)    |
| No tumour tissue available at LEMA centre         | 0           | 10 (2.4%)   | 0          | 1 (0.3%)    |
| Patient died before molecular analysis            | 0           | 1 (0.2%)    | 0          | 3 (0.9%)    |
| Biomarker (ROS1/RET) analysis failed <sup>a</sup> | 0           | 3 (0.7%)    | 2 (2.6%)   | 5 (1.5%)    |

  

| Non-squamous NSCLC                                | Stage I-III |             | Stage IV   |             |
|---------------------------------------------------|-------------|-------------|------------|-------------|
|                                                   | Run-in      | Protocol    | Run-in     | Protocol    |
| <b>Total number of patients</b>                   | 37          | 295         | 67         | 286         |
| Molecular profiling status unknown                | 0           | 1 (0.3%)    | 0          | 1 (0.3%)    |
| Completed molecular profiling                     | 20 (54.1%)  | 202 (68.7%) | 51 (76.1%) | 241 (84.6%) |
| Incomplete molecular profiling                    | 17 (45.9%)  | 92 (31.3%)  | 16 (23.9%) | 44 (15.4%)  |
| NGS and/or ALK test not requested                 | 11 (29.7%)  | 40 (13.6%)  | 4 (6.0%)   | 0 (0.4%)    |
| ROS1 and/or RET test not requested                | 0           | 9 (3.1%)    | 6 (9.0%)   | 11 (3.9%)   |
| <i>EGFR</i> and <i>ALK</i> testing not feasible   | 6 (16.2%)   | 40 (13.6%)  | 5 (7.5%)   | 28 (9.8%)   |
| Insufficient tumour tissue                        | 5 (13.5%)   | 28 (9.5%)   | 5 (7.5%)   | 19 (6.7%)   |
| No tumour tissue obtained                         | 1 (2.7%)    | 8 (2.7%)    | 0          | 6 (2.1%)    |
| No tumour tissue available at LEMA centre         | 0           | 4 (1.4%)    | 0          | 0           |
| Patient died before molecular analysis            | 0           | 0           | 0          | 3 (1.1%)    |
| Biomarker (ROS1/RET) analysis failed <sup>a</sup> | 0           | 3 (1.0%)    | 1 (1.5%)   | 4 (1.4%)    |

  

| Squamous NSCLC                                    | Stage I-III |            | Stage IV  |            |
|---------------------------------------------------|-------------|------------|-----------|------------|
|                                                   | Run-in      | Protocol   | Run-in    | Protocol   |
| <b>Total number of patients</b>                   | 23          | 119        | 9         | 42         |
| Molecular profiling status unknown                | 0           | 1 (0.8%)   | 0         | 0          |
| Completed molecular profiling                     | 11 (47.8%)  | 47 (39.8%) | 1 (11.1%) | 18 (42.9%) |
| Incomplete molecular profiling                    | 12 (52.2%)  | 71 (60.2%) | 8 (88.9%) | 24 (57.1%) |
| NGS and/or ALK test not requested                 | 12 (52.2%)  | 30 (25.4%) | 6 (66.7%) | 10 (23.8%) |
| ROS1 and/or RET test not requested                | 0           | 19 (16.1%) | 1 (11.1%) | 6 (14.3%)  |
| <i>EGFR</i> and <i>ALK</i> testing not feasible   | 0           | 22 (18.6%) | 0         | 7 (16.7%)  |
| Insufficient tumour tissue                        | 0           | 12 (10.2%) | 0         | 6 (14.3%)  |
| No tumour tissue obtained                         | 0           | 3 (2.5%)   | 0         | 0          |
| No tumour tissue available at LEMA centre         | 0           | 6 (5.1%)   | 0         | 1 (2.4%)   |
| Patient died before molecular analysis            | 0           | 1 (0.8%)   | 0         | 0          |
| Biomarker (ROS1/RET) analysis failed <sup>a</sup> | 0           | 0          | 1 (11.1%) | 1 (2.4%)   |

<sup>a</sup> in some patients, ROS1 and/or RET tested using FISH failed due to technical reasons
