# Supplementary material for: Optimising primary molecular profiling in non-small cell lung cancer
Source: PubMed Central journal article supplement (PMC11290658; doi:10.1371/journal.pone.0290939), 2024-07-31
Supplement: pone.0290939.s005.pdf [file pone.0290939.s005.pdf]

**S4 Table. Prevalence of oncogenic driver mutations.** Numbers represent n (% of tested in the category), unless stated otherwise. EGFR exon19/21 = currently targetable driver mutations in exon 19 or exon 21. MET ex14del = MET exon 14 skipping mutation. MET amp. = MET amplification. LCNEC – large cell neuroendocrine carcinoma. NOS = not otherwise specified. ca. = carcinoma. TPS = tumour proportion score. ab. = antibody. Percentages in PD-L1 TPS categories represents percentages of patients tested with the indicated antibody (22C3 or any other antibody).

|                         | EGFR (all)  | EGFR exon 19/21 | EGFR exon 20 ins | KRAS (all)  | KRAS G12C   | BRAF (all)  | BRAF V600E  | ERBB2       | ALK fusion  | ROS1 fusion | RET fusion  | MET ex14del | MET amp.    |
|-------------------------|-------------|-----------------|------------------|-------------|-------------|-------------|-------------|-------------|-------------|-------------|-------------|-------------|-------------|
| <b>Patients tested</b>  | 691 (78.7%) | 691 (78.7%)     | 691 (78.7%)      | 690 (78.6%) | 690 (78.6%) | 689 (78.5%) | 689 (78.5%) | 687 (78.2%) | 555 (63.2%) | 462 (52.6%) | 259 (29.5%) | 713 (81.2%) | 690 (78.6%) |
| <b>Total prevalence</b> | 78 (11.3%)  | 66 (9.6%)       | 5 (0.7%)         | 238 (34.5%) | 104 (15.1%) | 24 (3.5%)   | 12 (1.7%)   | 13 (1.9%)   | 14 (2.5%)   | 8 (1.7%)    | 7 (2.7%)    | 15 (2.1%)   | 9 (1.3%)    |
| <b>Sex</b>              |             |                 |                  |             |             |             |             |             |             |             |             |             |             |
| Male                    | 29 (8.1%)   | 22 (6.1%)       | 2 (0.6%)         | 101 (28.2%) | 36 (10.1%)  | 10 (2.8%)   | 7 (2.0%)    | 6 (1.7%)    | 5 (1.6%)    | 6 (2.3%)    | 4 (2.5%)    | 6 (1.6%)    | 5 (1.4%)    |
| Female                  | 49 (14.8%)  | 44 (13.3%)      | 3 (0.9%)         | 137 (41.3%) | 68 (20.5%)  | 14 (4.2%)   | 5 (1.5%)    | 7 (2.1%)    | 9 (3.6%)    | 2 (1.0%)    | 3 (3.1%)    | 9 (2.6%)    | 4 (1.2%)    |
| <b>Age</b>              |             |                 |                  |             |             |             |             |             |             |             |             |             |             |
| median (years)          | 66.1        | 66.1            | 61.1             | 66.2        | 67.7        | 67.9        | 69.5        | 75.4        | 58.9        | 68.6        | 71.7        | 76.4        | 66.2        |
| 54 or younger           | 12 (13.0%)  | 10 (10.9%)      | 1 (1.1%)         | 30 (32.6%)  | 13 (14.1%)  | 2 (2.2%)    | 2 (2.2%)    | 1 (1.1%)    | 4 (4.8%)    | 2 (2.8%)    | 3 (7.5%)    | 0           | 0           |
| 55 - 64 years           | 23 (11.5%)  | 21 (10.5%)      | 2 (1.0%)         | 78 (39.0%)  | 33 (16.5%)  | 7 (3.5%)    | 3 (1.5%)    | 2 (1.0%)    | 7 (4.3%)    | 1 (0.8%)    | 0           | 1 (0.5%)    | 4 (2.0%)    |
| 65 - 74 years           | 29 (11.6%)  | 22 (8.8%)       | 1 (0.4%)         | 90 (36.1%)  | 39 (15.7%)  | 12 (4.8%)   | 5 (2.0%)    | 3 (1.2%)    | 3 (1.6%)    | 4 (2.4%)    | 2 (2.2%)    | 5 (1.9%)    | 3 (1.2%)    |
| 75 or older             | 14 (9.4%)   | 13 (8.7%)       | 1 (0.7%)         | 40 (26.8%)  | 19 (12.8%)  | 3 (2.0%)    | 2 (1.3%)    | 7 (4.7%)    | 0           | 1 (1.0%)    | 2 (3.2%)    | 9 (5.8%)    | 2 (1.3%)    |
| <b>Smoking history</b>  |             |                 |                  |             |             |             |             |             |             |             |             |             |             |
| current                 | 8 (4.0%)    | 5 (2.5%)        | 0                | 79 (39.9%)  | 35 (17.7%)  | 8 (4.0%)    | 2 (1.0%)    | 1 (0.5%)    | 1 (0.6%)    | 1 (0.7%)    | 1 (1.3%)    | 1 (0.5%)    | 3 (1.5%)    |
| former                  | 24 (10.0%)  | 17 (7.1%)       | 5 (2.1%)         | 80 (33.2%)  | 36 (14.9%)  | 9 (3.7%)    | 7 (2.9%)    | 5 (2.1%)    | 5 (2.8%)    | 3 (1.9%)    | 0           | 10 (4.1%)   | 3 (1.2%)    |
| never                   | 26 (47.3%)  | 26 (47.3%)      | 0                | 5 (9.1%)    | 2 (3.6%)    | 2 (3.6%)    | 2 (3.6%)    | 1 (1.8%)    | 6 (14.3%)   | 3 (9.4%)    | 2 (12.5%)   | 4 (7.1%)    | 1 (1.8%)    |
| unknown                 | 20 (10.2%)  | 18 (9.1%)       | 0                | 74 (37.8%)  | 31 (15.8%)  | 5 (2.6%)    | 1 (0.5%)    | 6 (3.1%)    | 2 (1.3%)    | 1 (0.7%)    | 4 (5.1%)    | 0           | 2 (1.0%)    |

|                            |            |            |           |             |            |            |            |           |           |           |           |           |           |
|----------------------------|------------|------------|-----------|-------------|------------|------------|------------|-----------|-----------|-----------|-----------|-----------|-----------|
| <b>Stage</b>               |            |            |           |             |            |            |            |           |           |           |           |           |           |
| stage I-II                 | 24 (12.6%) | 17 (8.9%)  | 2 (1.0%)  | 60 (31.6%)  | 21 (11.1%) | 8 (4.2%)   | 3 (1.6%)   | 5 (2.6%)  | 3 (2.1%)  | 3 (2.2%)  | 0         | 6 (2.9%)  | 0         |
| stage III                  | 9 (6.4%)   | 9 (6.4%)   | 0         | 34 (24.3%)  | 18 (12.9%) | 2 (1.4%)   | 0          | 4 (2.9%)  | 1 (0.9%)  | 1 (1.0%)  | 3 (4.2%)  | 1 (0.7%)  | 3 (2.1%)  |
| stage IV                   | 45 (12.5%) | 40 (11.1%) | 3 (0.8%)  | 144 (40.0%) | 65 (18.1%) | 14 (3.9%)  | 9 (2.5%)   | 5 (1.1%)  | 10 (3.4%) | 4 (1.8%)  | 4 (3.5%)  | 8 (2.2%)  | 6 (17%)   |
| <b>Histology</b>           |            |            |           |             |            |            |            |           |           |           |           |           |           |
| adenocarcinoma             | 75 (14.9%) | 63 (12.5%) | 5 (1.0%)  | 211 (42.2%) | 92 (18.4%) | 21 (4.2%)  | 11 (2.2%)  | 13 (2.6%) | 13 (3.3%) | 8 (2.5%)  | 4 (2.6%)  | 13 (2.5%) | 8 (1.6%)  |
| squamous cell ca.          | 3 (2.5%)   | 3 (2.5%)   | 0         | 5 (4.2%)    | 1 (0.8%)   | 3 (2.5%)   | 1 (0.8%)   | 0         | 0         | 0         | 0         | 0         | 0         |
| adenosquamous ca.          | 0          | 0          | 0         | 3 (42.9%)   | 2 (28.6%)  | 0          | 0          | 0         | 1 (14.3%) | 0         | 0         | 0         | 0         |
| LCNEC                      | 0          | 0          | 0         | 3 (25.0%)   | 3 (25.0%)  | 0          | 0          | 0         | 0         | 0         | 1 (12.5%) | 0         | 0         |
| sarcomatoid ca.            | 0          | 0          | 0         | 3 (42.9%)   | 2 (28.6%)  | 0          | 0          | 0         | 0         | 0         | 1 (33.3%) | 1 (12.5%) | 0         |
| NOS or unknown             | 0          | 0          | 0         | 13 (29.5%)  | 4 (9.1%)   | 0          | 0          | 0         | 0         | 0         | 1 (4.5%)  | 1 (2.3%)  | 1 (2.3%)  |
| <b>PD-L1 TPS (22C3)</b>    |            |            |           |             |            |            |            |           |           |           |           |           |           |
| < 1%                       | 23 (52.3%) | 19 (50%)   | 2 (100%)  | 48 (34.8%)  | 13 (23.2%) | 5 (41.7%)  | 2 (28.6%)  | 3 (50.0%) | 2 (22.2%) | 2 (33.3%) | 0         | 2 (25.0%) | 4 (66.7%) |
| 1% - 50%                   | 13 (29.5%) | 11 (28.9%) | 0         | 21 (15.2%)  | 11 (19.6%) | 2 (16.7%)  | 0          | 1 (16.7%) | 3 (33.3%) | 1 (16.7%) | 3 (60.0%) | 2 (25.0%) | 2 (33.3%) |
| > 50%                      | 8 (18.2%)  | 8 (21.1%)  | 0         | 69 (50.0%)  | 32 (57.1%) | 5 (41.7%)  | 5 (71.4%)  | 2 (33.3%) | 4 (44.4%) | 3 (50.0%) | 2 (40.0%) | 4 (50.0%) | 0         |
| <b>PD-L1 TPS (any ab.)</b> |            |            |           |             |            |            |            |           |           |           |           |           |           |
| < 1%                       | 38 (55.9%) | 32 (54.2%) | 2 (66.7%) | 78 (34.8%)  | 28 (29.8%) | 10 (41.7%) | 2 (16.7%)  | 6 (50.0%) | 4 (33.3%) | 3 (42.9%) | 0         | 4 (33.3%) | 5 (71.4%) |
| 1% - 50%                   | 17 (25.0%) | 15 (25.4%) | 0         | 44 (19.6%)  | 18 (19.1%) | 2 (8.3%)   | 0          | 2 (16.7%) | 3 (25.0%) | 1 (14.3%) | 3 (60.0%) | 2 (25.0%) | 2 (28.6%) |
| > 50%                      | 13 (19.1%) | 12 (20.3%) | 1 (33.3%) | 102( 45.5%) | 48 (51.1%) | 12 (50.0%) | 10 (83.3%) | 4 (33.3%) | 5 (41.7%) | 3 (42.9%) | 2 (40.0%) | 5 (41.7%) | 0         |
