# Supplementary material for: Optimising primary molecular profiling in non-small cell lung cancer
Source: PubMed Central journal article supplement (PMC11290658; doi:10.1371/journal.pone.0290939), 2024-07-31
Supplement: pone.0290939.s006.pdf [file pone.0290939.s006.pdf]

**S5 Table. PD-L1 expression.** Numbers represent n (% of tested in the category), unless stated otherwise. TPS = tumour proportion score. ca. = carcinoma. LCNEC – large cell neuroendocrine carcinoma. NOS = not otherwise specified.

|                        | 22C3        |             |             | 22C3, SP263, E1L3N, other or unknown antibody |             |             |
|------------------------|-------------|-------------|-------------|-----------------------------------------------|-------------|-------------|
| PD-L1 TPS              | <1%         | 1% - 50%    | > 50%       | <1%                                           | 1% - 50%    | > 50%       |
| Total prevalence       | 187 (41.2%) | 113 (24.9%) | 154 (33.9%) | 310 (43.7%)                                   | 168 (23.7%) | 232 (32.7%) |
| <b>Sex</b>             |             |             |             |                                               |             |             |
| Male                   | 103 (43.3%) | 61 (25.6%)  | 74 (31.1%)  | 174 (45.7%)                                   | 94 (24.7%)  | 113 (29.7%) |
| Female                 | 84 (38.9%)  | 52 (24.1%)  | 80 (37.0%)  | 136 (41.3%)                                   | 74 (22.5%)  | 119 (36.2%) |
| <b>Age</b>             |             |             |             |                                               |             |             |
| median (years)         | 66.8        | 64.6        | 68.5        | 67.9                                          | 65.9        | 68.4        |
| 54 or younger          | 22 (36.7%)  | 21 (35.0%)  | 17 (28.3%)  | 38 (40.4%)                                    | 29 (30.9%)  | 27 (28.7%)  |
| 55 - 64 years          | 56 (42.1%)  | 39 (29.3%)  | 38 (28.6%)  | 81 (40.7%)                                    | 55 (27.6%)  | 63 (31.7%)  |
| 65 - 74 years          | 69 (39.9%)  | 35 (20.2%)  | 69 (39.9%)  | 117 (44.5%)                                   | 54 (20.5%)  | 32 (35.0%)  |
| 75 or older            | 40 (45.5%)  | 18 (20.5%)  | 30 (34.1%)  | 74 (48.1%)                                    | 30 (19.5%)  | 50 (32.5%)  |
| <b>Smoking history</b> |             |             |             |                                               |             |             |
| current                | 59 (38.8%)  | 44 (28.9%)  | 49 (32.2%)  | 85 (39.9%)                                    | 57 (26.8%)  | 71 (33.3%)  |
| former                 | 73 (44.2%)  | 37 (22.4%)  | 55 (33.3%)  | 108 (44.3%)                                   | 55 (22.5%)  | 81 (33.2%)  |
| never                  | 12 (33.3%)  | 12 (33.3%)  | 12 (33.3%)  | 20 (40.0%)                                    | 15 (30.0%)  | 15 (30.0%)  |
| unknown                | 43 (42.6%)  | 20 (19.8%)  | 38 (37.6%)  | 97 (47.8%)                                    | 41 (20.2%)  | 65 (32.0%)  |
| <b>Stage</b>           |             |             |             |                                               |             |             |
| stage I-II             | 60 (48.8%)  | 30 (24.4%)  | 33 (26.8%)  | 96 (49.7%)                                    | 47 (24.4%)  | 50 (25.9%)  |
| stage III              | 38 (39.6%)  | 35 (36.5%)  | 23 (24.0%)  | 71 (44.4%)                                    | 48 (30.0%)  | 41 (25.6%)  |
| stage IV               | 89 (37.9%)  | 48 (20.4%)  | 98 (41.7%)  | 143 (40.1%)                                   | 73 (20.4%)  | 141 (39.5%) |
| <b>Histology</b>       |             |             |             |                                               |             |             |
| adenocarcinoma         | 138 (44.7%) | 64 (20.7%)  | 107 (34.6%) | 225 (46.0%)                                   | 101 (20.7%) | 163 (33.3%) |
| squamous cell ca.      | 27 (29.7%)  | 38 (41.8%)  | 26 (28.6%)  | 53 (34.9%)                                    | 55 (36.2%)  | 44 (28.9%)  |
| adenosquamous ca.      | 0           | 0           | 5 (100%)    | 0                                             | 0           | 5 (100%)    |
| LCNEC                  | 3 (37.5%)   | 3 (37.5%)   | 2 (25.0%)   | 8 (61.5%)                                     | 3 (23.1%)   | 2 (15.4%)   |
| sarcomatoid ca.        | 2 (33.3%)   | 0           | 4 (66.7%)   | 3 (42.9%)                                     | 0           | 4 (57.1%)   |
| NOS or unknown         | 17 (48.6%)  | 8 (22.9%)   | 10 (28.6%)  | 21 (47.7%)                                    | 9 (20.5%)   | 14 (31.8%)  |
