# Supplementary material for: Optimising primary molecular profiling in non-small cell lung cancer
Source: PubMed Central journal article supplement (PMC11290658; doi:10.1371/journal.pone.0290939), 2024-07-31
Supplement: pone.0290939.s007.pdf [file pone.0290939.s007.pdf]

**S6 Table. EGFR and KRAS mutations in ctDNA.** Results of ddPCR analysis of ctDNA. EGFR exon 19 deletion, EGFR L858R, EGFR T790M and KRAS G12/G13 assessment was performed on a single 4 ml sample of plasma from treatment naïve patients. KRAS mutation analysis included G12A/C/D/R/S/V and G13D mutations. Numbers represent n (% of tested in that category), unless stated otherwise. † two patients had both EGFR exon 19 deletions and T790M in ctDNA.

|                             | EGFR ex19del | EGFR L858R  | EGFR T790M  | KRAS G12/G13 |
|-----------------------------|--------------|-------------|-------------|--------------|
| <b>Feasibility of ddPCR</b> |              |             |             |              |
| (% of samples obtained)     | 793 (96.6%)  | 798 (97.2%) | 774 (94.3%) | 788 (96.0%)  |
| <b>Sex</b>                  |              |             |             |              |
| Male                        | 3 (0.7%)     | 6 (1.4%)    | 1 (0.2%)    | 47 (11.3%)   |
| Female                      | 13 (3.5%)    | 10 (2.7%)   | 3 (0.8%)    | 53 (14.3%)   |
| <b>Age</b>                  |              |             |             |              |
| 54 or younger               | 6 (6.0%)     | 1 (1.0%)    | 2 (2.1%)    | 14 (14.1%)   |
| 55 - 64 years               | 4 (1.8%)     | 7 (3.2%)    | 1 (0.5%)    | 33 (15.3%)   |
| 65 - 74 years               | 3 (1.0%)     | 5 (1.7%)    | 1 (0.3%)    | 36 (12.1%)   |
| 75 or older                 | 3 (1.7%)     | 3 (1.7%)    | 0           | 17 (9.7%)    |
| <b>Smoking history</b>      |              |             |             |              |
| current                     | 2 (0.9%)     | 0           | 1 (0.4%)    | 38 (16.5%)   |
| former                      | 3 (1.1%)     | 4 (1.5%)    | 1 (0.4%)    | 28 (10.6%)   |
| never                       | 9 (17.0%)    | 5 (9.4%)    | 2 (3.8%)    | 3 (5.8%)     |
| unknown                     | 2 (0.8%)     | 7 (2.9%)    | 0           | 31 (12.9%)   |
| <b>Stage</b>                |              |             |             |              |
| stage I-II                  | 0            | 2 (0.8%)    | 0           | 5 (2.0%)     |
| stage III                   | 2 (1.1%)     | 1 (0.5%)    | 1 (0.5%)    | 15 (8.1%)    |
| stage IV                    | 14 (3.8%)    | 13 (3.6%)   | 3 (0.9%)    | 80 (22.3%)   |
| <b>Histology</b>            |              |             |             |              |
| adenocarcinoma              | 13 (2.5%)    | 14 (2.6%)   | 3 (0.6%)    | 87 (16.5%)   |
| squamous cell carcinoma     | 1 (0.6%)     | 2 (1.1%)    | 1 (0.6%)    | 2 (1.1%)     |
| adenosquamous carcinoma     | 0            | 0           | 0           | 0            |
| LCNEC                       | 0            | 0           | 0           | 2 (16.7%)    |
| sarcomatoid carcinoma       | 0            | 0           | 0           | 1 (12.5%)    |
| NOS or unknown              | 2 (3.5%)     | 0           | 0           | 8 (14.3%)    |
