# Supplementary material for: Optimising primary molecular profiling in non-small cell lung cancer
Source: PubMed Central journal article supplement (PMC11290658; doi:10.1371/journal.pone.0290939), 2024-07-31
Supplement: pone.0290939.s008.pdf [file pone.0290939.s008.pdf]

**S7 Table. Test characteristics of digital droplet PCR.** Analysis of ctDNA for the mutations of interest with ddPCR was performed on a single baseline 4 ml plasma sample. Sensitivity, specificity, positive predictive value (PPV) and negative predictive value (NPV) were calculated using standard contingency tables, including only patients who were tested for *EGFR* and *KRAS* in both tissue and blood samples.

| <b>Mutation</b>       | <b>Stage</b> | <b>n</b> | <b>Sensitivity</b> | <b>Specificity</b> | <b>PPV</b> | <b>NPV</b> |
|-----------------------|--------------|----------|--------------------|--------------------|------------|------------|
| <i>EGFR ex19del</i>   | All stages   | 632      | 41.4%              | 99.7%              | 85.7%      | 97.2%      |
|                       | Stage I-II   | 179      | 0.0%               | 100%               | n/a        | 96.6%      |
|                       | Stage III    | 127      | 25.0%              | 99.2%              | 50.0%      | 97.6%      |
|                       | Stage IV     | 326      | 57.9%              | 99.7%              | 91.7%      | 97.5%      |
| <i>EGFR L858R</i>     | All stages   | 637      | 53.6%              | 100%               | 100%       | 97.9%      |
|                       | Stage I-II   | 179      | 11.1%              | 100%               | 100%       | 95.5%      |
|                       | Stage III    | 130      | 25.0%              | 100%               | 100%       | 97.7%      |
|                       | Stage IV     | 328      | 86.7%              | 100%               | 100%       | 99.4%      |
| <i>KRAS</i>           | All stages   | 628      | 46.4%              | 98.9%              | 94.4%      | 81.8%      |
| <i>G12A/C/D/R/S/V</i> | Stage I-II   | 178      | 8.2%               | 100%               | 100%       | 74.1%      |
| <i>G13D</i>           | Stage III    | 129      | 35.7%              | 99.0%              | 90.9%      | 84.7%      |
|                       | Stage IV     | 321      | 67.0%              | 98.1%              | 94.7%      | 85.8%      |
